# Supplementary material
Source: publisher figshare collection journal article supplement (https://rs.figshare.com/ndownloader/files/21845991)
Supplement: Supplementary file 1 [file 21845991]

Document_ID	First_Author	Year	Title	DOI	n_Authors	n_Questions	n_Contributors	n_Rankers	involves_academia	involves_government	involves_NGO	involves_indigenous_org	involves_resource_users	times_cited	Cits_Y0	Cits_Y1	Cits_Y2	Cits_Y3	Cits_Y4	Cits_Y5	Cits_Y6	Cits_Y7	Cits_Y8	Cits_Y9	Cits_Y10	Cits_Y11	Cits_Y12	Cits_Y13	Scope_primary	Scope_secondary
M0042	Sutherland	2006	The Identification of 100 Ecological Questions of High Policy Relevance in the UK.	https://doi.org/10.1111/j.1365-2664.2006.01188.x	20	100	NA	NA	Y	Y	Y	N	N	307	1	17	18	31	29	30	26	36	34	28	14	18	19	6	Regional	NA
M0040	Sutherland	2009	One Hundred Questions of Importance to the Conservation of Global Biological Diversity.	https://doi.org/10.1111/j.1523-1739.2009.01212.x	44	100	761	NA	Y	Y	Y	N	N	295	7	33	43	26	40	30	28	27	22	24	15	NA	NA	NA	Discipline	NA
M0007	Brown	2010	Priority Water Research Questions as Determined by UK Practitioners and Policy Makers.	10.1016/j.scitotenv.2010.09.040	31	18	NA	35	Y	Y	Y	N	N	40	0	0	0	0	0	0	0	3	3	4	NA	NA	NA	NA	Ecosystem	Regional
M0032	Petrokofsky	2010	A Participatory Process for Identifying and Prioritizing Policy-Relevant Research Questions in Natural Resource Management: A Case Study from the UK Forestry Sector.	https://doi.org/10.1093/forestry/cpq018	21	10	481	43	NA	NA	NA	NA	NA	20	0	1	4	4	2	4	0	0	4	1	NA	NA	NA	NA	Ecosystem	Regional
M0012	Fleishman	2011	Top 40 Priorities for Science to Inform US Conservation and Management Policy.	https://doi.org/10.1525/bio.2011.61.4.9	30	40	374	20	NA	NA	NA	NA	NA	83	3	16	14	10	15	5	6	10	4	NA	NA	NA	NA	NA	Regional	NA
M0036	Rudd	2011	Generation of Priority Research Questions to Inform Conservation Policy and Management at a National Level.	10.1111/j.1523-1739.2010.01625.x	34	40	271	40	Y	Y	Y	N	N	49	2	7	8	7	3	6	4	7	5	NA	NA	NA	NA	NA	Regional	NA
M0006	Braunisch	2012	Conservation Science Relevant to Action: A Research Agenda Identified and Prioritized by Practitioners.	10.1016/j.biocon.2012.05.007	4	44	30	45	NA	NA	NA	NA	NA	52	0	7	9	9	9	6	6	5	NA	NA	NA	NA	NA	NA	Regional	NA
M0053	Cvitanovic	2013	Critical Research Needs for Managing Coral Reef Marine Protected Areas: Perspectives of Academics and Managers.	10.1016/j.jenvman.2012.10.051	37	41	30	31	Y	Y	N	N	N	27	0	3	7	7	5	3	2	NA	NA	NA	NA	NA	NA	NA	Ecosystem	NA
M0010	Dicks	2013	What Do We Need to Know to Enhance the Environmental Sustainability of Agricultural Production? A Prioritisation of Knowledge Needs for the UK Food System.	https://doi.org/10.3390/su5073095	40	26	46	38	Y	Y	Y	N	Y	16	1	1	2	3	5	1	3	NA	NA	NA	NA	NA	NA	NA	Ecosystem	Regional
M0009	Dicks	2013	Identifying Key Knowledge Needs for Evidence-Based Conservation of Wild Insect Pollinators: A Collaborative Cross-Sectoral Exercise.	https://doi.org/10.1111/j.1752-4598.2012.00221.x	50	35	48	48	Y	Y	Y	N	Y	39	4	3	10	8	9	4	1	NA	NA	NA	NA	NA	NA	NA	Taxa	NA
M0054	Feary	2013	Critical Research Needs for Identifying Future Changes in Gulf Coral Reef Ecosystems.	https://doi.org/10.1016/j.marpolbul.2013.02.038	34	45	31	31	NA	NA	NA	NA	NA	15	1	0	4	5	0	2	3	NA	NA	NA	NA	NA	NA	NA	Ecosystem	Regional
M0043	Sutherland	2013	Identification of 100 Fundamental Ecological Questions.	https://doi.org/10.1111/1365-2745.12025	34	100	388	NA	NA	NA	NA	NA	NA	300	18	33	46	51	64	46	40	NA	NA	NA	NA	NA	NA	NA	Discipline	NA
M0047	Walzer	2013	The 50 Most Important Questions Relating to the Maintenance and Restoration of an Ecological Continuum in the European Alps.	https://doi.org/10.1371/journal.pone.0053139	18	50	25	16	NA	NA	NA	NA	NA	13	0	1	5	2	3	2	0	NA	NA	NA	NA	NA	NA	NA	Regional	NA
M0002	Adewopo	2014	Top-Ranked Priority Research Questions for Soil Science in the 21 St Century.	10.2136/sssaj2013.07.0291	13	25	82	NA	NA	NA	NA	NA	NA	13	0	5	1	4	1	2	NA	NA	NA	NA	NA	NA	NA	NA	Discipline	NA
M0030	Parsons	2014	Seventy-One Important Questions for the Conservation of Marine Biodiversity.	https://doi.org/10.1111/cobi.12303	21	71	NA	17	NA	NA	NA	NA	NA	40	1	7	9	12	4	7	NA	NA	NA	NA	NA	NA	NA	NA	Ecosystem	NA
M0039	Seddon	2014	Looking Forward through the Past: Identification of 50 Priority Research Questions in Palaeoecology.	10.1111/1365-2745.12195	69	50	127	69	NA	NA	NA	NA	NA	112	5	30	25	26	18	6	NA	NA	NA	NA	NA	NA	NA	NA	Discipline	NA
M0058	Kennicutt	2015	A Roadmap for Antarctic and Southern Ocean Science for the next Two Decades and Beyond.	https://doi.org/10.1017/S0954102014000674	75	80	NA	75	NA	NA	NA	NA	NA	63	6	11	14	16	16	NA	NA	NA	NA	NA	NA	NA	NA	NA	Regional	NA
M0024	Mihok	2015	Bridging the Research-Practice Gap: Conservation Research Priorities in a Central and Eastern European Country.	10.1016/j.jnc.2015.09.010	36	50	NA	24	Y	Y	Y	N	Y	4	0	1	1	1	1	NA	NA	NA	NA	NA	NA	NA	NA	NA	Regional	NA
M0029	Parsons	2015	Key Research Questions of Global Importance for Cetacean Conservation.	10.3354/esr00655	27	30	33	NA	Y	Y	Y	N	N	20	0	4	6	7	3	NA	NA	NA	NA	NA	NA	NA	NA	NA	Taxa	NA
M0045	Varma	2015	Perceptions of Priority Issues in the Conservation of Biodiversity and Ecosystems in India.	10.1016/j.biocon.2015.04.031	30	152	572	NA	NA	NA	NA	NA	NA	5	0	1	1	3	0	NA	NA	NA	NA	NA	NA	NA	NA	NA	Regional	NA
M0051	Cramer	2016	Research Priorities for the Northern Quoll (Dasyurus Hallucatus) in the Pilbara Region of Western Australia.	10.1071/am15005	8	45	13	13	Y	Y	N	N	Y	8	1	4	1	2	NA	NA	NA	NA	NA	NA	NA	NA	NA	NA	Taxa	NA
M0052	Cramer	2016	Research Priorities for the Pilbara Leaf-Nosed Bat (Rhinonicteris Aurantia Pilbara Form).	https://doi.org/10.1071/AM15012	9	23	47	47	Y	Y	N	N	Y	1	0	1	0	0	NA	NA	NA	NA	NA	NA	NA	NA	NA	NA	Taxa	NA
M0013	Greggor	2016	Research Priorities from Animal Behaviour for Maximising Conservation Progress.	https://doi.org/10.1016/j.tree.2016.09.001	20	50	85	20	Y	Y	Y	N	N	33	0	7	8	17	NA	NA	NA	NA	NA	NA	NA	NA	NA	NA	Discipline	NA
M0019	Kaiser	2016	Prioritization of Knowledge-Needs to Achieve Best Practices for Bottom Trawling in Relation to Seabed Habitats.	10.1111/faf.12134	64	25	120	NA	Y	Y	Y	N	Y	14	1	3	7	3	NA	NA	NA	NA	NA	NA	NA	NA	NA	NA	Ecosystem	NA
M0020	Kark	2016	Priority Questions and Horizon Scanning for Conservation: A Comparative Study.	https://doi.org/10.1371/journal.pone.0145978	18	45	99	26	Y	Y	Y	Y	Y	5	0	1	0	4	NA	NA	NA	NA	NA	NA	NA	NA	NA	NA	Regional	NA
M0050	Antwis	2017	Fifty Important Research Questions in Microbial Ecology.	https://doi.org/10.1093/femsec/fix044	29	50	34	34	NA	NA	NA	NA	NA	17	1	5	11	NA	NA	NA	NA	NA	NA	NA	NA	NA	NA	NA	Taxa	NA
M0005	Armstrong	2017	Anthropological Contributions to Historical Ecology: 50 Questions, Infinite Prospects.	https://doi.org/10.1371/journal.pone.0171883	22	50	NA	47	NA	NA	NA	NA	NA	32	2	19	11	NA	NA	NA	NA	NA	NA	NA	NA	NA	NA	NA	Discipline	NA
M0057	Horne	2017	Research Priorities to Improve Future Environmental Water Outcomes.	10.3389/fenvs.2017.00089	11	10	65	40	NA	NA	NA	NA	NA	8	0	2	4	NA	NA	NA	NA	NA	NA	NA	NA	NA	NA	NA	Ecosystem	NA
M0021	Kramer	2017	Top 40 Questions in Coupled Human and Natural Systems (CHANS) Research.	https://doi.org/10.5751/ES-09429-220244	8	40	207	352	NA	NA	NA	NA	NA	11	2	6	3	NA	NA	NA	NA	NA	NA	NA	NA	NA	NA	NA	Ecosystem	NA
M0025	Morris	2017	Managing Bark Beetle Impacts on Ecosystems and Society: Priority Questions to Motivate Future Research.	10.1111/1365-2664.12782	16	25	NA	NA	NA	NA	NA	NA	NA	17	2	8	7	NA	NA	NA	NA	NA	NA	NA	NA	NA	NA	NA	Taxa	NA
M0055	Patino	2017	A Roadmap for Island Biology : 50 Fundamental Questions after 50 Years of The Theory of Island Biogeography.	https://doi.org/10.1111/jbi.12986	29	50	21	21	NA	NA	NA	NA	NA	31	4	9	18	NA	NA	NA	NA	NA	NA	NA	NA	NA	NA	NA	Discipline	NA
M0027	Neve	2018	Reviewing Research Priorities in Weed Ecology, Evolution and Management: A Horizon Scan.	https://doi.org/10.1111/wre.12304	35	30	35	35	Y	N	Y	N	N	5	1	3	NA	NA	NA	NA	NA	NA	NA	NA	NA	NA	NA	NA	Taxa	NA
M0028	Ockendon	2018	One Hundred Priority Questions for Landscape Restoration in Europe.	10.1016/j.biocon.2018.03.002	38	100	893	NA	Y	Y	Y	N	N	11	2	9	NA	NA	NA	NA	NA	NA	NA	NA	NA	NA	NA	NA	Regional	NA
M0031	Payne	2018	Community-Identified Key Research Questions for the Future of UK Afforested Peatlands.	https://doi.org/10.19189/MaP.2018.OMB.362	2	5	NA	67	NA	NA	NA	NA	NA	0	0	0	NA	NA	NA	NA	NA	NA	NA	NA	NA	NA	NA	NA	Ecosystem	Regional
M0061	Trnka	2018	Priority Questions in Multidisciplinary Drought Research.	10.3354/cr01509	38	60	65	18	NA	NA	NA	NA	NA	9	1	8	NA	NA	NA	NA	NA	NA	NA	NA	NA	NA	NA	NA	Discipline	NA
M0048	Weeks	2018	Research Priorities for Conservation and Natural Resource Management in Oceania's Small-Island Developing States.	https://doi.org/10.1111/cobi.12964	2	38	105	38	Y	Y	Y	N	N	3	1	2	NA	NA	NA	NA	NA	NA	NA	NA	NA	NA	NA	NA	Regional	NA
M0060	Bloschl	2019	Twenty-Three Unsolved Problems in Hydrology (UPH)-a Community Perspective.	10.1080/02626667.2019.1620507	205	23	NA	NA	NA	NA	NA	NA	NA	8	3	NA	NA	NA	NA	NA	NA	NA	NA	NA	NA	NA	NA	NA	Discipline	NA
M0008	Coleman	2019	Top 100 Research Questions for Biodiversity Conservation in Southeast Asia.	https://doi.org/10.1016/j.biocon.2019.03.028	52	100	NA	52	NA	NA	NA	NA	NA	1	1	NA	NA	NA	NA	NA	NA	NA	NA	NA	NA	NA	NA	NA	Regional	NA
M0059	Fairbrother	2019	Toward Sustainable Environmental Quality: Priority Research Questions for North America.	10.1002/etc.4502	37	40	NA	NA	NA	NA	NA	NA	NA	2	2	NA	NA	NA	NA	NA	NA	NA	NA	NA	NA	NA	NA	NA	Regional	NA
M0016	Jarvis	2019	Key Research Priorities for the Future of Marine Science in New Zealand.	https://doi.org/10.1016/j.marpol.2019.103539	2	89	244	49	Y	Y	Y	N	N	0	0	NA	NA	NA	NA	NA	NA	NA	NA	NA	NA	NA	NA	NA	Ecosystem	Regional
M0049	Lohmus	2019	Prioritizing Research Gaps for National Conservation Management and Policy: The Managers' Perspective in Estonia.	https://doi.org/10.1007/s10531-019-01779-8	5	26	39	39	Y	Y	Y	N	N	0	0	NA	NA	NA	NA	NA	NA	NA	NA	NA	NA	NA	NA	NA	Regional	NA
